# Supplementary material
Source: PubMed Central journal article supplement (PMC1559743)
Supplement: pnas_0605420103_4.pdf [file pnas_0605420103_4.pdf]

**Table 1. Half-life measurement for a random sample of 151 proteins used to establish half-life measurement repeatability**

| ORF     | Gene name | First HL, minutes | Second HL, minutes |
|---------|-----------|-------------------|--------------------|
| YGL252C | RTG2      | 70                | 69                 |
| YGR204W | ADE3      | 81                | 86                 |
| YLR103C | CDC45     | 66                | 78                 |
| YNL127W |           | 97                | 84                 |
| YJL069C |           | 85                | 60                 |
| YAL005C | SSA1      | 119               | 77                 |
| YDR101C |           | 168               | 96                 |
| YDR194C | MSS116    | 86                | 162                |
| YDL174C | DLD1      | 137               | 61                 |
| YGL234W | ADE5,7    | 80                | 162                |
| YLR289W | GUF1      | 84                | 300                |
| YHL007C | STE20     | 98                | 300                |
| YER103W | SSA4      | 100               | 300                |
| YPR019W | CDC54     | 61                | 300                |
| YML056C | IMD4      | 300               | 65                 |
| YGL234W | ADE5,7    | 300               | 162                |
| YDL190C | UFD2      | 105               | 300                |
| YOR335C | ALA1      | 300               | 108                |
| YOR076C |           | 20                | 20                 |
| YDR243C | PRP28     | 31                | 31                 |
| YLR427W |           | 24                | 24                 |
| YJL209W | CBP1      | 43                | 43                 |
| YLR028C | ADE16     | 300               | 59                 |
| YOL113W | SKM1      | 20                | 21                 |
| YLL026W | HSP104    | 59                | 61                 |
| YIL137C |           | 37                | 36                 |
| YHR015W | MIP6      | 2                 | 2                  |
| YPR190C | RPC82     | 26                | 27                 |
| YML082W |           | 107               | 58                 |
| YPR135W | CTF4      | 51                | 49                 |
| YGL107C |           | 52                | 55                 |
| YJL154C | VPS35     | 57                | 320                |
| YPR141C | KAR3      | 29                | 27                 |
| YMR277W | FCP1      | 18                | 20                 |
| YDR356W | NUF1      | 33                | 36                 |
| YPR091C |           | 56                | 51                 |
| YPL040C | ISM1      | 55                | 300                |
| YGR246C | BRF1      | 24                | 26                 |
| YIL017C | VID28     | 7                 | 7                  |
| YGL125W | MET13     | 300               | 54                 |
| YMR125W | STO1      | 54                | 65                 |
| YML054C | CYB2      | 64                | 54                 |
| YKL185W | ASH1      | 3                 | 2                  |
| YBR260C | RGD1      | 51                | 45                 |
| YML042W | CAT2      | 41                | 47                 |
| YIL130W |           | 3                 | 3                  |
| YOL025W | LAG2      | 31                | 36                 |
| YIL075C | RPN2      | 52                | 400                |

|         |         |     |       |
|---------|---------|-----|-------|
| YCR084C | TUP1    | 32  | 27    |
| YHR120W | MSH1    | 52  | 78    |
| YGL060W |         | 53  | 45    |
| YKL005C |         | 19  | 22    |
| YIL155C | GUT2    | 98  | 51    |
| YNL118C | DCP2    | 43  | 36    |
| YBR169C | SSE2    | 50  | 5,252 |
| YMR287C | MSU1    | 42  | 35    |
| YOL117W |         | 43  | 51    |
| YPR008W |         | 20  | 17    |
| YGL227W | VID30   | 48  | 62    |
| YOR350C | MNE1    | 39  | 31    |
| YML109W | ZDS2    | 83  | 47    |
| YDL227C | HO      | 3   | 2     |
| YOL090W | MSH2    | 25  | 32    |
| YPL084W | BRO1    | 34  | 27    |
| YKR036C | CAF4    | 44  | 34    |
| YMR019W | STB4    | 2   | 3     |
| YKL134C |         | 48  | 37    |
| YJL057C | IKS1    | 16  | 21    |
| YGR162W | TIF4631 | 32  | 42    |
| YJL128C | PBS2    | 48  | 36    |
| YCR088W | ABP1    | 14  | 18    |
| YIL101C | XBP1    | 26  | 19    |
| YPL007C | TFC8    | 71  | 44    |
| YNL008C |         | 271 | 44    |
| YLR060W | FRS1    | 300 | 44    |
| YKR089C |         | 23  | 17    |
| YER075C | PTP3    | 26  | 38    |
| YFR040W | SAP155  | 300 | 42    |
| YNL218W |         | 32  | 22    |
| YDL220C | CDC13   | 60  | 42    |
| YMR227C | TAF67   | 38  | 55    |
| YOL066C | RIB2    | 164 | 42    |
| YBR017C | KAP104  | 99  | 41    |
| YGL113W | SLD3    | 11  | 16    |
| YER049W |         | 23  | 35    |
| YIL056W |         | 39  | 26    |
| YAR014C | BUD14   | 19  | 29    |
| YMR120C | ADE17   | 91  | 39    |
| YGR287C |         | 39  | 4,816 |
| YPR179C | PLO1    | 19  | 30    |
| YER088C | DOT6    | 29  | 18    |
| YKR002W | PAP1    | 38  | 23    |
| YGR100W | MDR1    | 37  | 106   |
| YKL135C | APL2    | 37  | 71    |
| YCR038C | BUD5    | 36  | 122   |
| YLR234W | TOP3    | 45  | 27    |
| YML023C |         | 22  | 36    |
| YPR111W | DBF20   | 26  | 16    |
| YLR369W | SSQ1    | 35  | 61    |
| YNL047C |         | 29  | 49    |
| YDL113C |         | 32  | 55    |
| YKL048C | ELM1    | 25  | 42    |
| YOR207C | RET1    | 44  | 25    |
| YDR389W | SAC7    | 28  | 16    |

|         |        |     |     |
|---------|--------|-----|-----|
| YKL032C | IXR1   | 17  | 10  |
| YPL086C | ELP3   | 55  | 32  |
| YOR147W |        | 72  | 32  |
| YDR137W | RGP1   | 118 | 32  |
| YDR294C | DPL1   | 87  | 32  |
| YAL011W |        | 30  | 56  |
| YLR117C | CLF1   | 69  | 31  |
| YNL023C | FAP1   | 31  | 89  |
| YEL032W | MCM3   | 130 | 31  |
| YDR144C | MKC7   | 115 | 31  |
| YNL308C | KRI1   | 300 | 31  |
| YBR212W | NGR1   | 56  | 28  |
| YPL263C | KEL3   | 95  | 29  |
| YDR307W |        | 300 | 29  |
| YGR140W | CBF2   | 29  | 101 |
| YBR123C | TFC1   | 47  | 22  |
| YOR308C | SNU66  | 47  | 22  |
| YLR299W | ECM38  | 8   | 18  |
| YMR288W | HSH155 | 460 | 27  |
| YNL094W |        | 27  | 64  |
| YNL197C | WHI3   | 10  | 22  |
| YMR080C | NAM7   | 42  | 18  |
| YLR002C |        | 19  | 44  |
| YGR068C |        | 60  | 25  |
| YGR250C |        | 85  | 24  |
| YNL236W | SIN4   | 24  | 300 |
| YBR073W | RDH54  | 12  | 30  |
| YLR429W | CRN1   | 60  | 23  |
| YJL127C | SPT10  | 60  | 22  |
| YMR224C | MRE11  | 18  | 7   |
| YOR154W |        | 91  | 21  |
| YIL015W | BAR1   | 2   | 7   |
| YOR299W | BUD7   | 20  | 62  |
| YGL066W |        | 69  | 20  |
| YOR349W | CIN1   | 53  | 16  |
| YNL039W | TFC5   | 70  | 13  |
| YEL007W | TOS9   | 37  | 8   |
| YGR186W | TFG1   | 10  | 290 |
| YFR048W |        | 15  | 2   |
| YHR149C |        | 110 | 9   |
| YNL082W | PMS1   | 32  | 2   |
| YGL099W | KRE35  | 3   | 44  |
| YBR289W | SNF5   | 60  | 3   |
| YOR363C | PIP2   | 76  | 3   |
| YER032W | FIR1   | 235 | 3   |
| YBR094W |        | 127 | 2   |
| YKL112W | ABF1   | 205 | 2   |

HL, half-life.
