# Supplementary material
Source: PubMed Central journal article supplement (PMC1559743)
Supplement: pnas_0605420103_5.pdf [file pnas_0605420103_5.pdf]

**Table 2. Comparison of half-lives measured for tagged and untagged versions of proteins**

| <b>ORF</b> | <b>Gene name</b> | <b>Untagged HL, minutes</b> | <b>Tagged HL, minutes</b> |
|------------|------------------|-----------------------------|---------------------------|
| YBL007C    | SLA1             | 100                         | 41                        |
| YBL017C    | PEP1             | 39                          | 30                        |
| YCR012W    | PGK1             | 771                         | 199                       |
| YCR052W    | RSC6             | 32                          | 34                        |
| YCR088W    | ABP1             | 34                          | 18                        |
| YDR088C    | SLU7             | 280                         | 79                        |
| YDR129C    | SAC6             | 76                          | 96                        |
| YER095W    | RAD51            | 674                         | 60                        |
| YER120W    | SCS2             | 334                         | 553                       |
| YFR053C    | HXK1             | 300                         | 49                        |
| YGL044C    | RNA15            | 137                         | 71                        |
| YGL061C    | DUO1             | 68                          | 76                        |
| YGL244W    | RTF1             | 82                          | 23                        |
| YHR027C    | RPN1             | 300                         | 49                        |
| YIL075C    | RPN2             | 105                         | 400                       |
| YJL034W    | KAR2             | 300                         | 124                       |
| YJR093C    | FIP1             | 303                         | 72                        |
| YLR113W    | HOG1             | 300                         | 273                       |
| YLR277C    | YSH1             | 45                          | 34                        |
| YLR429W    | CRN1             | 22                          | 23                        |
| YMR297W    | PRC1             | 2                           | 13                        |
| YNL243W    | SLA2             | 38                          | 480                       |
| YPL129W    | ANC1             | 145                         | 251                       |
| YPR119W    | CLB2             | 25                          | 22                        |

HL, half-life.
