# Supplementary material
Source: PubMed Central journal article supplement (PMC1559743)
Supplement: pnas_0605420103_6.pdf [file pnas_0605420103_6.pdf]

**Table 3. Comparison of half-lives generated by our method with those previously reported in literature**

| ORF     | Gene name | Ref. | Literature HL, minutes | Measured HL, minutes |
|---------|-----------|------|------------------------|----------------------|
| YAR007C | RFA1      | 1    | 35                     | 35                   |
| YDL020C | RPN4      | 2    | 2                      | 3                    |
| YDL130W | RPP1B     | 3    | 0-20                   | 395                  |
| YDL155W | CLB3      | 4    | 0-20                   | 20                   |
| YDL227C | HO        | 5    | 10                     | 2                    |
| YDR309C | GIC2      | 4    | 0-30                   | 13                   |
| YDR382W | RPP2B     | 3    | 300                    | 300                  |
| YEL009C | GCN4      | 6, 7 | 5                      | 5                    |
| YER095W | RAD51     | 8    | 120                    | 60                   |
| YER133W | GLC7      | 9    | 180                    | 61                   |
| YGL181W | GTS1      | 10   | 200                    | 63                   |
| YGR108W | CLB1      | 11   | 0-20                   | 14                   |
| YGR140W | CBF2      | 12   | >60                    | 101                  |
| YPL059W | GRX5      | 13   | 240                    | 89                   |
| YIL046W | MET30     | 14   | 0-20                   | 3                    |
| YJL006C | CTK2      | 15   | 0-20                   | 28                   |
| YJL157C | FAR1      | 4    | 25                     | 15                   |
| YJR060W | CBF1      | 14   | 30                     | 38                   |
| YKR002W | PAP1      | 16   | 1,000                  | 23                   |
| YKR094C | RPL40B    | 17   | 120                    | 300                  |
| YLR079W | SIC1      | 18   | 40                     | 33                   |
| YLR362W | STE11     | 19   | 200                    | 79                   |
| YLR450W | HMG2      | 20   | 55                     | 93                   |
| YML032C | RAD52     | 8    | 15                     | 27                   |
| YML085C | TUB1      | 21   | >60                    | 41                   |
| YML112W | CTK3      | 15   | 30                     | 38                   |
| YMR168C | CEP3      | 12   | >60                    | 22                   |
| YMR199W | CLN1      | 22   | 7                      | 6                    |
| YNL103W | MET4      | 14   | 30                     | 9                    |
| YOR058C | ASE1      | 23   | 5                      | 3                    |
| YOR073W | SGO1      | 24   | 0-20                   | 11                   |
| YOR153W | PDR5      | 25   | 75                     | 89                   |
| YOR270C | VPH1      | 26   | 27                     | 44                   |
| YPL038W | MET31     | 14   | 30                     | 95                   |
| YPL059W | GRX5      | 13   | 240                    | 94                   |
| YPL256C | CLN2      | 22   | 7                      | 5                    |
| YPR119W | CLB2      | 11   | 0-20                   | 22                   |
| YPR120C | CLB5      | 27   | 35                     | 44                   |

HL, half-life.

1. Erdeniz, N. & Rothstein, R. (2000) *Mol Cell Biol* **20**, 224-32.
2. Xie, Y. & Varshavsky, A. (2001) *Proc Natl Acad Sci U S A* **98**, 3056-61.
3. Nusspaumer, G., Remacha, M. & Ballesta, J. P. (2000) *Embo J* **19**, 6075-84.

4. Blondel, M., Galan, J. M., Chi, Y., Lafourcade, C., Longaretti, C., Deshaies, R. J. & Peter, M. (2000) *Embo J* **19**, 6085-97.
5. Kaplun, L., Ivantsiv, Y., Kornitzer, D. & Raveh, D. (2000) *Proc Natl Acad Sci U S A* **97**, 10077-82.
6. Hinnebusch, A. G. & Natarajan, K. (2002) *Eukaryot Cell* **1**, 22-32.
7. Meimoun, A., Holtzman, T., Weissman, Z., McBride, H. J., Stillman, D. J., Fink, G. R. & Kornitzer, D. (2000) *Mol Biol Cell* **11**, 915-27.
8. Asleson, E. N. & Livingston, D. M. (2003) *Genetics* **163**, 91-101.
9. Nigavekar, S. S., Tan, Y. S. & Cannon, J. F. (2002) *Arch Biochem Biophys* **404**, 71-9.
10. Saito, T., Mitsui, K., Hamada, Y. & Tsurugi, K. (2002) *J Biol Chem* **277**, 33624-31.
11. Blondel, M. & Mann, C. (1996) *Nature* **384**, 279-82.
12. Russell, I. D., Grancell, A. S. & Sorger, P. K. (1999) *J Cell Biol* **145**, 933-50.
13. Belli, G., Polaina, J., Tamarit, J., De La Torre, M. A., Rodriguez-Manzanque, M. T., Ros, J. & Herrero, E. (2002) *J Biol Chem* **277**, 37590-6.
14. Rouillon, A., Barbey, R., Patton, E. E., Tyers, M. & Thomas, D. (2000) *Embo J* **19**, 282-94.
15. Hautbergue, G. & Goguel, V. (2001) *J Biol Chem* **276**, 8005-13.
16. Mizrahi, N. & Moore, C. (2000) *Mol Cell Biol* **20**, 2794-802.
17. Hanna, J., Leggett, D. S. & Finley, D. (2003) *Mol Cell Biol* **23**, 9251-61.
18. Bailly, E. & Reed, S. I. (1999) *Mol Cell Biol* **19**, 6872-90.
19. Esch, R. K. & Errede, B. (2002) *Proc Natl Acad Sci U S A* **99**, 9160-5.
20. Hampton, R. Y. & Rine, J. (1994) *J Cell Biol* **125**, 299-312.
21. Vega, L. R., Fleming, J. & Solomon, F. (1998) *Mol Biol Cell* **9**, 2349-60.
22. Tyers, M., Tokiwa, G., Nash, R. & Futcher, B. (1992) *Embo J* **11**, 1773-84.
23. Huang, J. N., Park, I., Ellingson, E., Littlepage, L. E. & Pellman, D. (2001) *J Cell Biol* **154**, 85-94.
24. Indjeian, V. B., Stern, B. M. & Murray, A. W. (2005) *Science* **307**, 130-3.
25. Egner, R., Mahe, Y., Pandjaitan, R. & Kuchler, K. (1995) *Mol Cell Biol* **15**, 5879-87.
26. Graham, L. A., Hill, K. J. & Stevens, T. H. (1998) *J Cell Biol* **142**, 39-49.
27. Seufert, W., Futcher, B. & Jentsch, S. (1995) *Nature* **373**, 78-81.
