# Supplementary material
Source: PubMed Central journal article supplement (PMC1559743)
Supplement: pnas_0605420103_7.pdf [file pnas_0605420103_7.pdf]

**Table 4. Localization enrichment of clusters shown in Fig 2**

| <b>Cluster key</b> | <b>Component</b> | <b>log<sub>10</sub>, uncorrected <i>P</i> value</b> | <b>log<sub>10</sub>, corrected <i>P</i> value</b> | <b>Component genes in cluster</b> |
|--------------------|------------------|-----------------------------------------------------|---------------------------------------------------|-----------------------------------|
| ---                | Ambiguous        | -5.9719                                             | -2.52288                                          | 26                                |
| ---                | Spindle-pole     | -5.3212                                             | -2.52288                                          | 12                                |
| ++-                | Cytoplasm        | -13.9812                                            | -3                                                | 287                               |
| ++-                | Nucleolus        | -5.6035                                             | -2.52288                                          | 40                                |
| ++*                | Cytoplasm        | -5.5881                                             | -2.52288                                          | 95                                |
| +*+                | ER               | -5.2331                                             | -2.30103                                          | 16                                |
| --+                | Ambiguous        | -5.3434                                             | -2.52288                                          | 47                                |
| --+                | Microtubule      | -3.9743                                             | -1.25181                                          | 9                                 |
| +++                | Vacuole          | -9.1362                                             | -3                                                | 18                                |
| +++                | Golgi            | -6.4024                                             | -3                                                | 11                                |
| *+-                | Mitochondrion    | -3.4736                                             | -0.85699                                          | 26                                |
