# Supplementary material
Source: PubMed Central journal article supplement (PMC1559743)
Supplement: pnas_0605420103_8.pdf [file pnas_0605420103_8.pdf]

**Table 5. GO term enrichment of clusters shown in Fig 4**

| Cluster key | GO term                                           | log <sub>10</sub> , uncorrected P value | log <sub>10</sub> , corrected P value | GO term genes in cluster | GO term ID | Domain |
|-------------|---------------------------------------------------|-----------------------------------------|---------------------------------------|--------------------------|------------|--------|
| ++-         | Cytosol                                           | -47.8318                                | -3                                    | 132                      | GO:0005829 | NA     |
| ++-         | Cytosolic ribosome (sensu Eukarya)                | -41.0607                                | -3                                    | 75                       | GO:0005830 | NA     |
| ++-         | Biosynthesis                                      | -33.8271                                | -3                                    | 191                      | GO:0009058 | P      |
| ++-         | Ribosome                                          | -32.6875                                | -3                                    | 92                       | GO:0005840 | NA     |
| ++-         | Metabolism                                        | -20.092                                 | -3                                    | 386                      | GO:0008152 | P      |
| ++-         | Cytoplasm                                         | -19.8972                                | -3                                    | 423                      | GO:0005737 | NA     |
| ++-         | Cytosolic small ribosomal subunit (sensu Eukarya) | -19.8562                                | -3                                    | 31                       | GO:0005843 | NA     |
| ++-         | Oxidoreductase activity                           | -11.7823                                | -3                                    | 57                       | GO:0016491 | F      |
| ++-         | Protein metabolism                                | -11.5394                                | -3                                    | 178                      | GO:0019538 | P      |
| ++-         | Intracellular                                     | -11.3697                                | -3                                    | 494                      | GO:0005622 | NA     |
| ++-         | Hexose catabolism                                 | -8.7402                                 | -3                                    | 13                       | GO:0019320 | P      |
| ++-         | Ribosome biogenesis and assembly                  | -7.9759                                 | -3                                    | 50                       | GO:0042254 | P      |
| ++-         | Nucleotide metabolism                             | -7.651                                  | -3                                    | 21                       | GO:0009117 | P      |
| ++-         | Ribosome assembly                                 | -7.4322                                 | -3                                    | 21                       | GO:0042255 | P      |
| ++-         | Catabolism                                        | -6.9129                                 | -2.39794                              | 58                       | GO:0009056 | P      |
| ++-         | Amino acid and derivative metabolism              | -6.5057                                 | -2.39794                              | 37                       | GO:0006519 | P      |
| ++-         | Nucleobase metabolism                             | -6.4924                                 | -2.39794                              | 13                       | GO:0009112 | P      |
| ++-         | Organic acid metabolism                           | -6.4052                                 | -2.39794                              | 47                       | GO:0006082 | P      |
| ++-         | Endoplasmic reticulum                             | -5.3214                                 | -1.39794                              | 61                       | GO:0005783 | NA     |
| ++-         | Energy pathways                                   | -5.0823                                 | -1.22915                              | 36                       | GO:0006091 | P      |
| ++*         | Biosynthesis                                      | -7.7316                                 | -3                                    | 56                       | GO:0009058 | P      |
| ++*         | Cytoplasm                                         | -6.4233                                 | -2.39794                              | 136                      | GO:0005737 | NA     |
| ++*         | Cytosol                                           | -5.5464                                 | -1.60206                              | 29                       | GO:0005829 | NA     |
| ---+        | Cell cycle                                        | -8.193                                  | -3                                    | 87                       | GO:0007049 | P      |
| ---+        | DNA metabolism                                    | -8.0034                                 | -3                                    | 78                       | GO:0006259 | P      |
| ---+        | Regulation of transcription                       | -7.6716                                 | -3                                    | 62                       | GO:0045449 | P      |
| ---+        | DNA binding                                       | -7.4522                                 | -3                                    | 44                       | GO:0003677 | F      |
| ---+        | Transcription factor activity                     | -5.0226                                 | -1.16749                              | 16                       | GO:0003700 | F      |
| +*-         | Mitochondrial large ribosomal subunit             | -6.2114                                 | -2.1549                               | 9                        | GO:0005762 | NA     |
| +++         | External                                          | -9.2259                                 | -3                                    | 14                       | GO:0030312 | NA     |

|     |                           |         |          |    |            |    |
|-----|---------------------------|---------|----------|----|------------|----|
|     | encapsulating structure   |         |          |    |            |    |
| +++ | Glycoprotein biosynthesis | -6.3714 | -2.39794 | 12 | GO:0009101 | P  |
| *+- | Mitochondrial matrix      | -6.1199 | -2.09691 | 15 | GO:0005759 | NA |
