# Supplementary material
Source: PubMed Central journal article supplement (PMC1559743)
Supplement: pnas_0605420103_9.pdf [file pnas_0605420103_9.pdf]

**Table 6. Cluster key for Tables 4 and 5**

| <b>Cluster key position</b> | <b>Protein attribute</b> |
|-----------------------------|--------------------------|
| 1                           | Production rate          |
| 2                           | Abundance                |
| 3                           | Half -life               |
|                             |                          |
| <b>Character value</b>      | <b>Meaning</b>           |
| +                           | Upper 40th percentile    |
| -                           | Lower 40th percentile    |
| *                           | Middle 20th percentile   |
