# Supplementary material
Source: PubMed Central journal article supplement (PMC1559743)
Supplement: pnas_0605420103_10.pdf [file pnas_0605420103_10.pdf]

**Table 7. Spearman rank correlation relating half-life and amino acid density**

| <b>Amino acid</b> | <b>Spearman correlation</b> | <b>P value</b> |
|-------------------|-----------------------------|----------------|
| SER               | -0.2240                     | 6.9e-44        |
| ASN               | -0.2093                     | 2.0e-38        |
| PRO               | -0.0838                     | 2.7e-07        |
| THR               | -0.0734                     | 6.7e-06        |
| HIS               | -0.0601                     | 2.3e-04        |
| PHE               | -0.0378                     | 2.1e-02        |
| GLN               | -0.0337                     | 3.9e-02        |
| CYS               | -0.0333                     | 4.2e-02        |
| TYR               | -0.0319                     | 5.1e-02        |
| MET               | -0.0147                     | 3.7e-01        |
| ASP               | -0.0081                     | 6.2e-01        |
| ARG               | -0.0034                     | 8.3e-01        |
| TRP               | 0.0016                      | 9.2e-01        |
| LEU               | 0.0122                      | 4.6e-01        |
| ILE               | 0.0399                      | 1.5e-02        |
| GLU               | 0.0701                      | 1.8e-05        |
| LYS               | 0.0912                      | 2.2e-08        |
| GLY               | 0.1267                      | 6.9e-15        |
| ALA               | 0.1413                      | 3.5e-18        |
| VAL               | 0.1944                      | 2.8e-33        |
