# Supplementary material
Source: PubMed Central journal article supplement (PMC1559743)
Supplement: pnas_0605420103_11.pdf [file pnas_0605420103_11.pdf]

**Table 8. Genes in the two sample transcription modules used to establish correlation between half life and transcription regulation**

| <b>Module 524 ORF</b> | <b>Module 524 gene names</b> | <b>Module 412 ORF</b> | <b>Module 412 genes names</b> |
|-----------------------|------------------------------|-----------------------|-------------------------------|
| YML093W               |                              | YJL101C               | GSH1                          |
| YBR266C               |                              | YLR149C               |                               |
| YPL183C               |                              | YLR460C               |                               |
| YPL043W               | NOP4                         | YLR108C               |                               |
| YPL043W               | NOP4                         | YML116W               | ATR1                          |
| YIL096C               |                              | YLL060C               | GTT2                          |
| YLR435W               |                              | YOR226C               | ISU2                          |
| YLR175W               | CBF5                         | YGR088W               | CTT1                          |
| YHR066W               | SSF1                         | YML128C               | MSC1                          |
| YNL132W               | KRE33                        | YLR270W               | DCS1                          |
| YPL146C               |                              | YML100W               | TSL1                          |
| YGL078C               | DBP3                         | YKR076W               | ECM4                          |
| YBR247C               | ENP1                         | YDR032C               | PST2                          |
| YGL029W               | CGR1                         | YMR105C               | PGM2                          |
| YBL024W               | NCL1                         | YOR120W               | GCY1                          |
| YAL059W               | ECM1                         | YJR122W               | CAF17                         |
| YML080W               | DUS1                         | YFR053C               | HXK1                          |
| YOR310C               | NOP58                        | YNL274C               |                               |
| YIR026C               | yvh1                         | YMR315W               |                               |
| YBR034C               | HMT1                         | YDL124W               |                               |
| YLR196W               | PWP1                         | YMR318C               | ADH6                          |
| YOL124C               |                              | YJR048W               | CYC1                          |
| YOR272W               | YTM1                         | YMR250W               | GAD1                          |
| YLR222C               |                              | YMR173W               | DDR48                         |
| YER082C               | KRE31                        | YKR011C               |                               |
| YGR245C               | SDA1                         | YDR368W               | YPR1                          |
| YDR346C               |                              | YGR008C               | STF2                          |
| YPL126W               | NAN1                         | YOL151W               | GRE2                          |
| YJL122W               |                              | YNL134C               |                               |
| YER126C               | KRE32                        | YMR090W               |                               |
| YBL028C               |                              | YBL064C               | PRX1                          |
| YHR197W               |                              | YKL103C               | LAP4                          |
| YBR271W               |                              | YHR029C               |                               |
| YHR170W               | NMD3                         | YDR453C               | TSA2                          |
| YNL141W               | AAH1                         | YHR104W               | GRE3                          |
| YJR063W               | RPA12                        | YBR244W               | GPX2                          |
| YDR101C               |                              | YML028W               | TSA1                          |
| YNL002C               | RLP7                         | YHR008C               | SOD2                          |
| YBR267W               |                              | YKR066C               | CCP1                          |
| YNL110C               |                              | YML131W               |                               |
| YKR081C               |                              | YJR104C               | SOD1                          |
| YOL077C               | BRX1                         | YLR109W               | AHP1                          |
| YCL059C               | KRR1                         | YDR513W               | TTR1                          |
| YHR052W               |                              | YGL037C               | PNC1                          |
| YOR206W               |                              |                       |                               |

|         |       |
|---------|-------|
| YDR399W | HPT1  |
| YNL113W | rpc19 |
| YOR004W |       |
| YOR095C | RK11  |
| YNR053C |       |
| YNL061W | NOP2  |
