# Supplementary material
Source: PubMed Central journal article supplement (PMC1559743)
Supplement: pnas_0605420103_12.pdf [file pnas_0605420103_12.pdf]

**Table 9. Data for 7/8 dilution experiment used to establish linear and dynamic range of the Western blots and estimate the maximum detectable half-life**

| <b>No. of dilutions</b> | <b>Protein concentration, fmole</b> | <b>Raw intensity</b> | <b>Corrected intensity</b> | <b>ln, corrected intensity</b> |
|-------------------------|-------------------------------------|----------------------|----------------------------|--------------------------------|
| 0                       | 6.6234                              | 2594617              | 2110617                    | 14.56249088                    |
| 1                       | 5.7955                              | 1820148              | 1426908                    | 14.17102042                    |
| 2                       | 5.0710                              | 1603983              | 1245983                    | 14.03543533                    |
| 3                       | 4.4372                              | 1561806              | 1184331                    | 13.98468862                    |
| 4                       | 3.8825                              | 1309028              | 953309                     | 13.76769437                    |
| 5                       | 3.3972                              | 1213946              | 902285                     | 13.71268571                    |
| 6                       | 2.9726                              | 1050662              | 795502                     | 13.58672864                    |
| 7                       | 2.6010                              | 956494               | 720614                     | 13.48785891                    |
| 8                       | 2.2759                              | 846880               | 647960                     | 13.38158425                    |
| 9                       | 1.9914                              | 822844               | 614129                     | 13.32796028                    |
| 10                      | 1.7425                              | 624022               | 442477                     | 13.00014376                    |
| 11                      | 1.5246                              | 505537               | 353461                     | 12.77552843                    |
| 12                      | 1.3341                              | 551447               | 395381                     | 12.88760514                    |
| 13                      | 1.1673                              | 485759               | 335393                     | 12.72305826                    |
| 14                      | 1.0214                              | 485277               | 330997                     | 12.70986459                    |
| 15                      | 0.8937                              | 398761               | 266641                     | 12.49365846                    |
| 16                      | 0.7820                              | 395812               | 258922                     | 12.46428214                    |
| 17                      | 0.6843                              | 359447               | 233411                     | 12.36055613                    |
| 18                      | 0.5987                              | 400699               | 272259                     | 12.5145091                     |
| 19                      | 0.5239                              | 362415               | 235995                     | 12.3715659                     |
| 20                      | 0.4584                              | 259671               | 141211                     | 11.8580105                     |
| 21                      | 0.4011                              | 217199               | 103139                     | 11.54383287                    |
