# Supplementary material
Source: PubMed Central journal article supplement (PMC1559743)

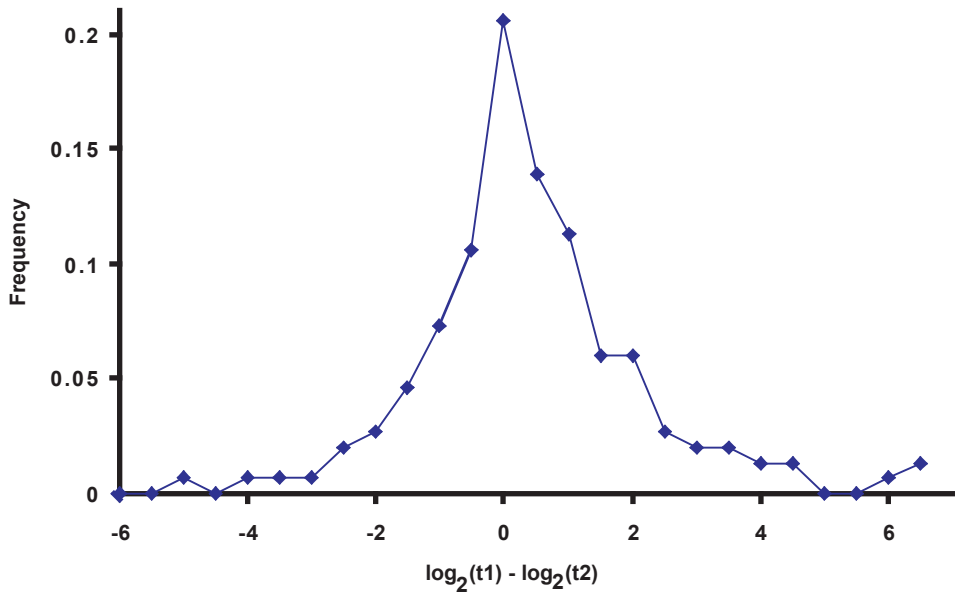

Supplement: pnas_0605420103_1.pdf [file pnas_0605420103_1.pdf]

A

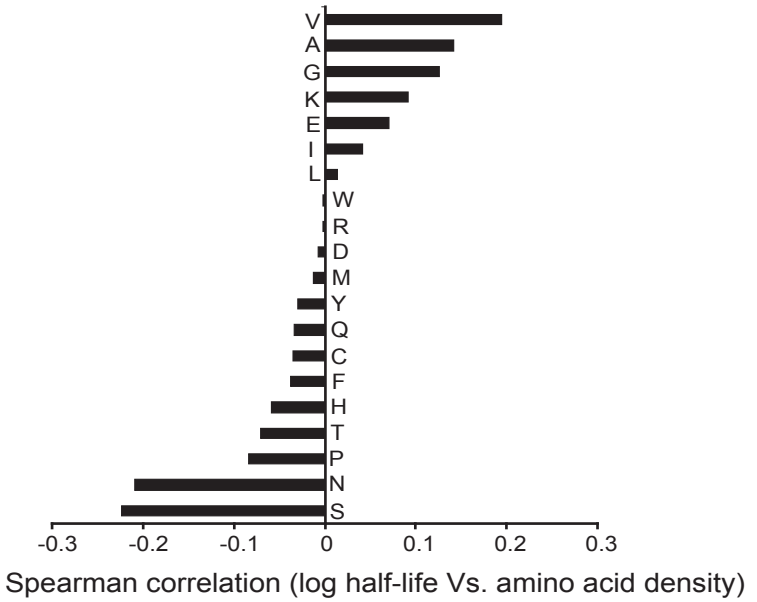

B

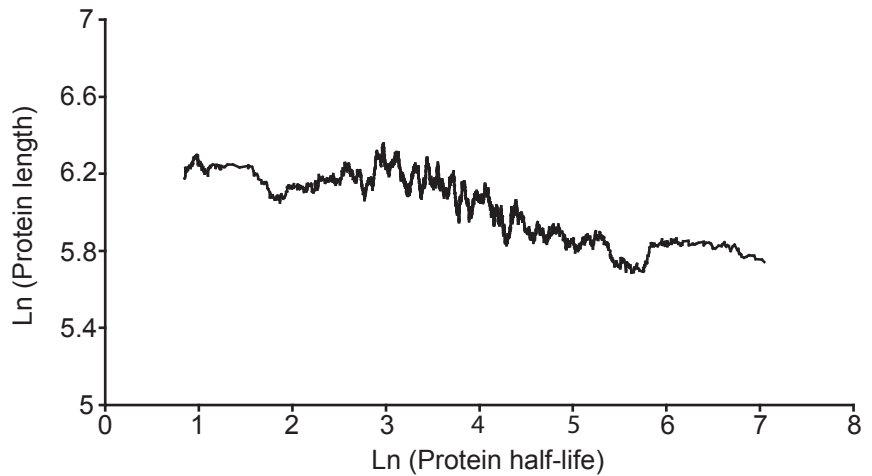

Supplement: pnas_0605420103_2.pdf [file pnas_0605420103_2.pdf]

A

1 minute exposure

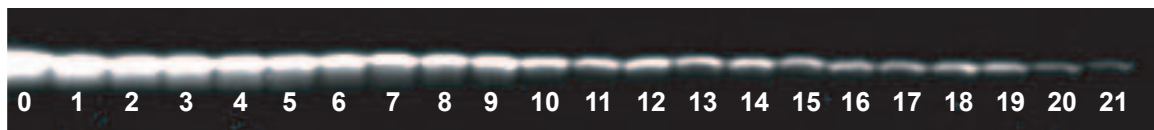

B

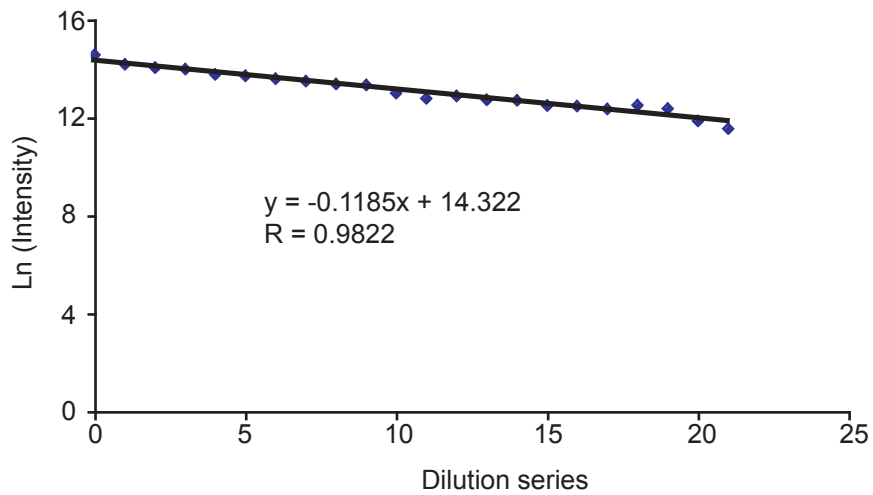

Supplement: pnas_0605420103_3.pdf [file pnas_0605420103_3.pdf]
